# Supplementary material for: PML-1 protein ubiquitinates TAB1/TAK1 for LRP1 anti-inflammation signal
Source: Research Square preprint supplement (doi:10.21203/rs.3.rs-8725456/v1), 2026-02-24
Supplement: Supplementary file 1 [file fe783054e3b4402ae96b521a.docx]

**PML-1 protein ubiquitinates TAB1/TAK1 for LRP1 anti-inflammation signal**

**Supplementary Information Guide:**

**Supplementary Tables**

Table 1. *PML-1*-MYC, *TAB1*-Flag and *TAK1*-Flag PCR primer sequences.

Table 2. PML-1-LRP1 Docking Energy Value.

Table 3. The distances (Å) between amino acid atoms involved in the PML-1 protein (A) and the LRP1-85kDa protein (B) interaction.

Table 4. The distances (Å) between amino acid atoms involved in the TAB1 protein (B) and the TAK1 protein (A) interaction.

Table 5. PML-1 protein and TAB1-TAK1 complex docking energy values.

Table 6. The distances (Å) between amino acid atoms involved in the PML-1 protein (C) and the TAK1 (A)/TAB1 (B) complex interaction.

**1. Supplementary Tables**

**Table 1. *PML-1*-MYC, *TAB1*-Flag and *TAK1*-Flag PCR primer sequences.**

| primer | Primer Sequence Information |
| --- | --- |
| *PML-1*-myc-F | 5’-AGGGAGACCCAAGCTGGCTAGCGCCACCATGGAGCCTGCACC-3’ |
| *PML-1*-myc -R1 | 5’-CACTGATTAGTTTCTGTTCGCTCTGCTGGGAGGCCCTCT-3’ |
| *PML-1*-myc -R2 | 5’-ACTGGACTAGTGGATCCTCATAAATCTTCTTCACTGATTA-3’ |
| *TAB1*-Flag-F | 5’-AGTCCAGTGTGGTGGAATTCATGGCGGCGCAGAGGAGGAG-3’ |
| *TAB1*-Flag-R1 | 5’-CATGATCTTTATAATCACCGTCATGGTCTTTGTAGTCCATCGGTGCTGTCACCACGCT-3’ |
| *TAB1*-Flag-R2  *TAK1*-Flag-F  *TAK1*-Flag-R1  *TAK1*-Flag-R2 | 5’-GATATCTGCAGAATTCTCACTTGTCATCGTCATCCTTGTAGTCGATGTCATGATCTT-3’  5’-AGTCCAGTGTGGTGGAATTCATGTCTACAGCCTCTGCCGC-3’  5’-CATGATCTTTATAATCACCGTCATGGTCTTTGTAGTCCATTGAAGTGCCTTGTCGTTTCT-3’  5’-GATATCTGCAGAATTCTCACTTGTCATCGTCATCCTTGTAGTCGATGTCATGATCTT-3’ |

**Table 2. PML-1-LRP1 Docking Energy Value.**

| Pose | 1 | 2 | 3 | 4 | 5 | 6 | 7 | 8 | 9 | 10 |
| --- | --- | --- | --- | --- | --- | --- | --- | --- | --- | --- |
| Docking Score | -305.71 | -298.84 | -295.50 | -294.09 | -293.53 | -290.17 | -277.93 | -267.75 | -266.67 | -262.67 |
| Confidence Score | 0.96 | 0.95 | 0.95 | 0.95 | 0.95 | 0.94 | 0.93 | 0.91 | 0.91 | 0.90 |
| Ligand rmsd (Å) | 169.74 | 145.31 | 159.13 | 95.00 | 195.01 | 151.68 | 159.98 | 158.71 | 111.74 | 172.06 |

Note: The models are ranked according to the docking scores.

**Table 3. The distances (Å) between amino acid atoms involved in the PML-1 protein (A) and the LRP1-85kDa protein (B) interaction.**

| **PML-1** | **LRP1-85 kDa** | **Distance** | **PML-1** | **LRP1-85 kDa** | **Distance** | **PML-1** | **LRP1-85 kDa** | **Distance** |
| --- | --- | --- | --- | --- | --- | --- | --- | --- |
| 326A | 4424B | 1.32 | 349A | 4401B | 3.25 | 356A | 4416B | 4.18 |
| 330A | 4416B | 1.36 | 316A | 4431B | 3.28 | 333A | 4413B | 4.20 |
| 337A | 4413B | 1.56 | 302A | 4442B | 3.31 | 302A | 4446B | 4.22 |
| 323A | 4424B | 1.65 | 334A | 4413B | 3.33 | 298A | 4449B | 4.25 |
| 367A | 4427B | 1.69 | 371A | 4435B | 3.37 | 294A | 4450B | 4.27 |
| 349A | 4402B | 1.76 | 316A | 4428B | 3.38 | 373A | 4441B | 4.28 |
| 390A | 4456B | 1.76 | 367A | 4431B | 3.40 | 345A | 4411B | 4.28 |
| 380A | 4445B | 1.83 | 329A | 4416B | 3.43 | 598A | 4447B | 4.31 |
| 364A | 4423B | 1.86 | 383A | 4449B | 3.44 | 298A | 4446B | 4.31 |
| 595A | 4447B | 1.92 | 345A | 4402B | 3.52 | 319A | 4427B | 4.34 |
| 764A | 4458B | 1.99 | 312A | 4435B | 3.52 | 359A | 4420B | 4.40 |
| 360A | 4420B | 2.29 | 291A | 4454B | 3.56 | 323A | 4421B | 4.40 |
| 763A | 4458B | 2.57 | 323A | 4425B | 3.59 | 346A | 4402B | 4.44 |
| 333A | 4414B | 2.62 | 367A | 4428B | 3.61 | 371A | 4431B | 4.51 |
| 364A | 4427B | 2.76 | 319A | 4431B | 3.61 | 305A | 4439B | 4.54 |
| 301A | 4442B | 2.76 | 301A | 4449B | 3.61 | 336A | 4411B | 4.55 |
| 376A | 4445B | 2.86 | 373A | 4438B | 3.62 | 380A | 4449B | 4.56 |
| 294A | 4453B | 2.86 | 319A | 4428B | 3.63 | 596A | 4447B | 4.60 |
| 376A | 4442B | 2.86 | 320A | 4428B | 3.65 | 391A | 4456B | 4.61 |
| 337A | 4411B | 2.88 | 383A | 4452B | 3.67 | 765A | 4458B | 4.63 |
| 287A | 4457B | 2.89 | 322A | 4424B | 3.68 | 294A | 4454B | 4.64 |
| 370A | 4434B | 2.92 | 379A | 4449B | 3.73 | 365A | 4427B | 4.68 |
| 323A | 4428B | 2.93 | 312A | 4431B | 3.74 | 294A | 4449B | 4.71 |
| 291A | 4453B | 2.93 | 373A | 4445B | 3.76 | 316A | 4435B | 4.77 |
| 367A | 4426B | 2.93 | 364A | 4424B | 3.79 | 342A | 4384B | 4.78 |
| 371A | 4438B | 2.98 | 290A | 4456B | 3.84 | 762A | 4458B | 4.78 |
| 291A | 4457B | 2.99 | 367A | 4434B | 3.89 | 373A | 4437B | 4.79 |
| 371A | 4434B | 3.00 | 326A | 4416B | 3.96 | 594A | 4455B | 4.81 |
| 342A | 4383B | 3.02 | 315A | 4431B | 3.97 | 346A | 4400B | 4.87 |
| 305A | 4442B | 3.12 | 369A | 4434B | 4.01 | 369A | 4431B | 4.88 |
| 367A | 4430B | 3.14 | 319A | 4424B | 4.04 | 331A | 4416B | 4.88 |
| 377A | 4445B | 3.16 | 326A | 4420B | 4.04 | 333A | 4412B | 4.88 |
| 287A | 4456B | 3.17 | 316A | 4432B | 4.08 | 294A | 4452B | 4.99 |
| 601A | 4454B | 3.17 | 327A | 4425B | 4.08 |  |  |  |
| 353A | 4401B | 3.23 | 326A | 4421B | 4.14 |  |  |  |

Note: The light green area in the table indicates that the distance between the amino acid atoms of the two interacting proteins is less than 1.8 Å, which suggests that a covalent bond was formed between the two amino acids. The pink area in the table indicates that the distance between the amino acid atoms of the two interacting proteins is greater than 1.8 Å and less than 3.5 Å, which suggests that hydrogen bonding interactions have been formed between the two amino acids. The light yellow area in the table indicates that the distance between the amino acid atoms of the two interacting proteins is greater than 3.5 Å, suggesting that hydrophobic or other types of interactions between the two amino acids have been formed.

**Table 4. The distances (Å) between amino acid atoms involved in the TAB1 protein (B) and the TAK1 protein (A) interaction.**

| **TAB1** | **TAK1** | **Distance** | **TAB1** | **TAK1** | **Distance** | **TAB1** | **TAK1** | **Distance** |
| --- | --- | --- | --- | --- | --- | --- | --- | --- |
| 360B | 489A | 1.2 | 19B | 280A | 3.5 | 19B | 282A | 4.4 |
| 290B | 484A | 2.2 | 295B | 477A | 3.6 | 257B | 495A | 4.4 |
| 294B | 477A | 2.2 | 287B | 488A | 3.6 | 22B | 368A | 4.4 |
| 272B | 59A | 2.4 | 24B | 371A | 3.6 | 286B | 488A | 4.4 |
| 359B | 483A | 2.5 | 149B | 367A | 3.7 | 290B | 485A | 4.5 |
| 148B | 25A | 2.5 | 258B | 488A | 3.7 | 295B | 476A | 4.5 |
| 295B | 475A | 2.5 | 83B | 374A | 3.7 | 56B | 378A | 4.5 |
| 149B | 364A | 2.7 | 257B | 497A | 3.7 | 273B | 59A | 4.6 |
| 84B | 374A | 2.7 | 24B | 368A | 3.7 | 83B | 371A | 4.6 |
| 290B | 488A | 2.8 | 27B | 371A | 3.8 | 270B | 59A | 4.6 |
| 291B | 477A | 2.8 | 56B | 380A | 3.8 | 24B | 369A | 4.6 |
| 29B | 377A | 2.8 | 356B | 485A | 3.9 | 26B | 371A | 4.7 |
| 25B | 371A | 2.9 | 81B | 374A | 3.9 | 292B | 475A | 4.7 |
| 82B | 374A | 2.9 | 148B | 323A | 3.9 | 27B | 372A | 4.7 |
| 356B | 489A | 3.0 | 148B | 321A | 3.9 | 148B | 322A | 4.7 |
| 149B | 26A | 3.0 | 359B | 485A | 4.0 | 151B | 26A | 4.7 |
| 286B | 484A | 3.0 | 257B | 491A | 4.0 | 278B | 25A | 4.8 |
| 292B | 477A | 3.1 | 207B | 57A | 4.0 | 56B | 377A | 4.8 |
| 56B | 379A | 3.1 | 29B | 379A | 4.0 | 205B | 61A | 4.8 |
| 356B | 488A | 3.2 | 288B | 477A | 4.0 | 258B | 491A | 4.8 |
| 293B | 477A | 3.3 | 85B | 374A | 4.0 | 289B | 481A | 4.9 |
| 289B | 480A | 3.3 | 27B | 373A | 4.0 | 28B | 376A | 4.9 |
| 359B | 486A | 3.4 | 27B | 374A | 4.0 | 149B | 368A | 4.9 |
| 148B | 369A | 3.4 | 356B | 492A | 4.2 | 132B | 477A | 4.9 |
| 208B | 57A | 3.4 | 149B | 369A | 4.2 | 55B | 377A | 5.0 |
| 289B | 484A | 3.4 | 293B | 475A | 4.2 | 290B | 483A | 5.0 |
| 93B | 377A | 3.5 | 150B | 26A | 4.3 |  |  |  |
| 355B | 485A | 3.5 | 148B | 26A | 4.3 |  |  |  |

Note: The light green area in the table indicates that the distance between the amino acid atoms of the two interacting proteins is less than 1.8 Å, which suggests that a covalent bond was formed between the two amino acids. The pink area in the table indicates that the distance between the amino acid atoms of the two interacting proteins is greater than 1.8 Å and less than 3.5 Å, which suggests that hydrogen bonding interactions have been formed between the two amino acids. The light yellow area in the table indicates that the distance between the amino acid atoms of the two interacting proteins is greater than 3.5 Å, suggesting that hydrophobic or other types of interactions between the two amino acids have been formed.

**Table 5. PML-1 protein and TAB1-TAK1 complex docking energy values.**

| Pose | 1 | 2 | 3 | 4 | 5 | 6 | 7 | 8 | 9 | 10 |
| --- | --- | --- | --- | --- | --- | --- | --- | --- | --- | --- |
| Docking Score | -315.2 | -302.4 | -297.8 | -287.2 | -262.1 | -258.6 | -251.2 | -242.9 | -242.9 | -241.4 |
| Confidence Score | 0.96 | 0.95 | 0.95 | 0.94 | 0.90 | 0.90 | 0.88 | 0.87 | 0.87 | 0.86 |
| Ligand rmsd (Å) | 160.13 | 125.42 | 113.24 | 101.24 | 76.23 | 161.56 | 81.12 | 77.00 | 89.72 | 164.27 |

Note: The models are ranked according to the docking scores.

**Table 6. The distances (Å) between amino acid atoms involved in the PML-1 protein (C) and the TAK1 (A)/TAB1 (B) complex interaction.**

| **PML-1** | **TAK1(A) /TAB1(B)** | **Distance** | **PML-1** | **TAK1(A) /TAB1(B)** | **Distance** | **PML-1** | **TAK1(A) /TAB1(B)** | **Distance** |
| --- | --- | --- | --- | --- | --- | --- | --- | --- |
| 562C | 335A | 1.63 | 561C | 332A | 3.48 | 562C | 31A | 4.28 |
| 740C | 465A | 1.75 | 622C | 470A | 3.49 | 561C | 35A | 4.30 |
| 649C | 24A | 1.91 | 645C | 278B | 3.51 | 646C | 86B | 4.32 |
| 648C | 148B | 1.95 | 560C | 336A | 3.52 | 574C | 467A | 4.32 |
| 572C | 465A | 2.08 | 577C | 468A | 3.55 | 563C | 43A | 4.34 |
| 645C | 281B | 2.12 | 643C | 87B | 3.55 | 646C | 142B | 4.38 |
| 555C | 315A | 2.20 | 649C | 23A | 3.57 | 561C | 336A | 4.41 |
| 574C | 466A | 2.21 | 570C | 465A | 3.59 | 648C | 147B | 4.41 |
| 555C | 319A | 2.22 | 574C | 465A | 3.62 | 563C | 44A | 4.42 |
| 741C | 465A | 2.25 | 562C | 35A | 3.66 | 554C | 373A | 4.46 |
| 649C | 25A | 2.29 | 562C | 32A | 3.72 | 619C | 469A | 4.50 |
| 649C | 55A | 2.36 | 648C | 322A | 3.72 | 650C | 322A | 4.52 |
| 575C | 468A | 2.58 | 563C | 335A | 3.75 | 651C | 324A | 4.54 |
| 648C | 146B | 2.59 | 574C | 468A | 3.75 | 644C | 86B | 4.55 |
| 646C | 146B | 2.64 | 648C | 145B | 3.77 | 682C | 467A | 4.55 |
| 649C | 324A | 2.73 | 560C | 332A | 3.80 | 576C | 468A | 4.58 |
| 651C | 328A | 2.74 | 563C | 33A | 3.85 | 647C | 146B | 4.58 |
| 648C | 25A | 2.75 | 644C | 281B | 3.87 | 562C | 33A | 4.62 |
| 643C | 86B | 2.81 | 620C | 289B | 3.89 | 617C | 469A | 4.72 |
| 563C | 35A | 2.83 | 571C | 465A | 3.91 | 647C | 25A | 4.75 |
| 563C | 45A | 2.83 | 645C | 285B | 3.92 | 650C | 324A | 4.77 |
| 558C | 336A | 2.87 | 620C | 481A | 3.96 | 647C | 278B | 4.79 |
| 644C | 139B | 2.87 | 562C | 332A | 4.11 | 648C | 323A | 4.80 |
| 622C | 469A | 2.98 | 682C | 469A | 4.15 | 646C | 85B | 4.81 |
| 649C | 27A | 3.01 | 563C | 34A | 4.15 | 786C | 471A | 4.82 |
| 620C | 478A | 3.06 | 567C | 13A | 4.15 | 562C | 328A | 4.82 |
| 561C | 335A | 3.10 | 619C | 468A | 4.15 | 557C | 329A | 4.86 |
| 575C | 466A | 3.27 | 619C | 478A | 4.15 | 725C | 466A | 4.90 |
| 559C | 332A | 3.28 | 622C | 478A | 4.16 | 656C | 375A | 4.97 |
| 645C | 282B | 3.30 | 557C | 319A | 4.18 | 651C | 325A | 4.98 |
| 646C | 143B | 3.34 | 649C | 26A | 4.19 | 649C | 28A | 5.00 |
| 557C | 320A | 3.42 | 557C | 316A | 4.21 | 559C | 336A | 5.00 |
| 648C | 324A | 3.44 | 622C | 472A | 4.24 |  |  |  |

Note: The light green area in the table indicates that the distance between the amino acid atoms of the two interacting proteins is less than 1.8 Å, which suggests that a covalent bond was formed between the two amino acids. The pink area in the table indicates that the distance between the amino acid atoms of the two interacting proteins is greater than 1.8 Å and less than 3.5 Å, which suggests that hydrogen bonding interactions have been formed between the two amino acids. The light yellow area in the table indicates that the distance between the amino acid atoms of the two interacting proteins is greater than 3.5 Å, suggesting that hydrophobic or other types of interactions between the two amino acids have been formed.
